# Supplementary material
Source: publisher site journal article supplement (https://www.dovepress.com/article/550882)
Supplement: Supplementary file 1 [file Supplementary%20materials.docx]

**Supplementary Fig. S1.**


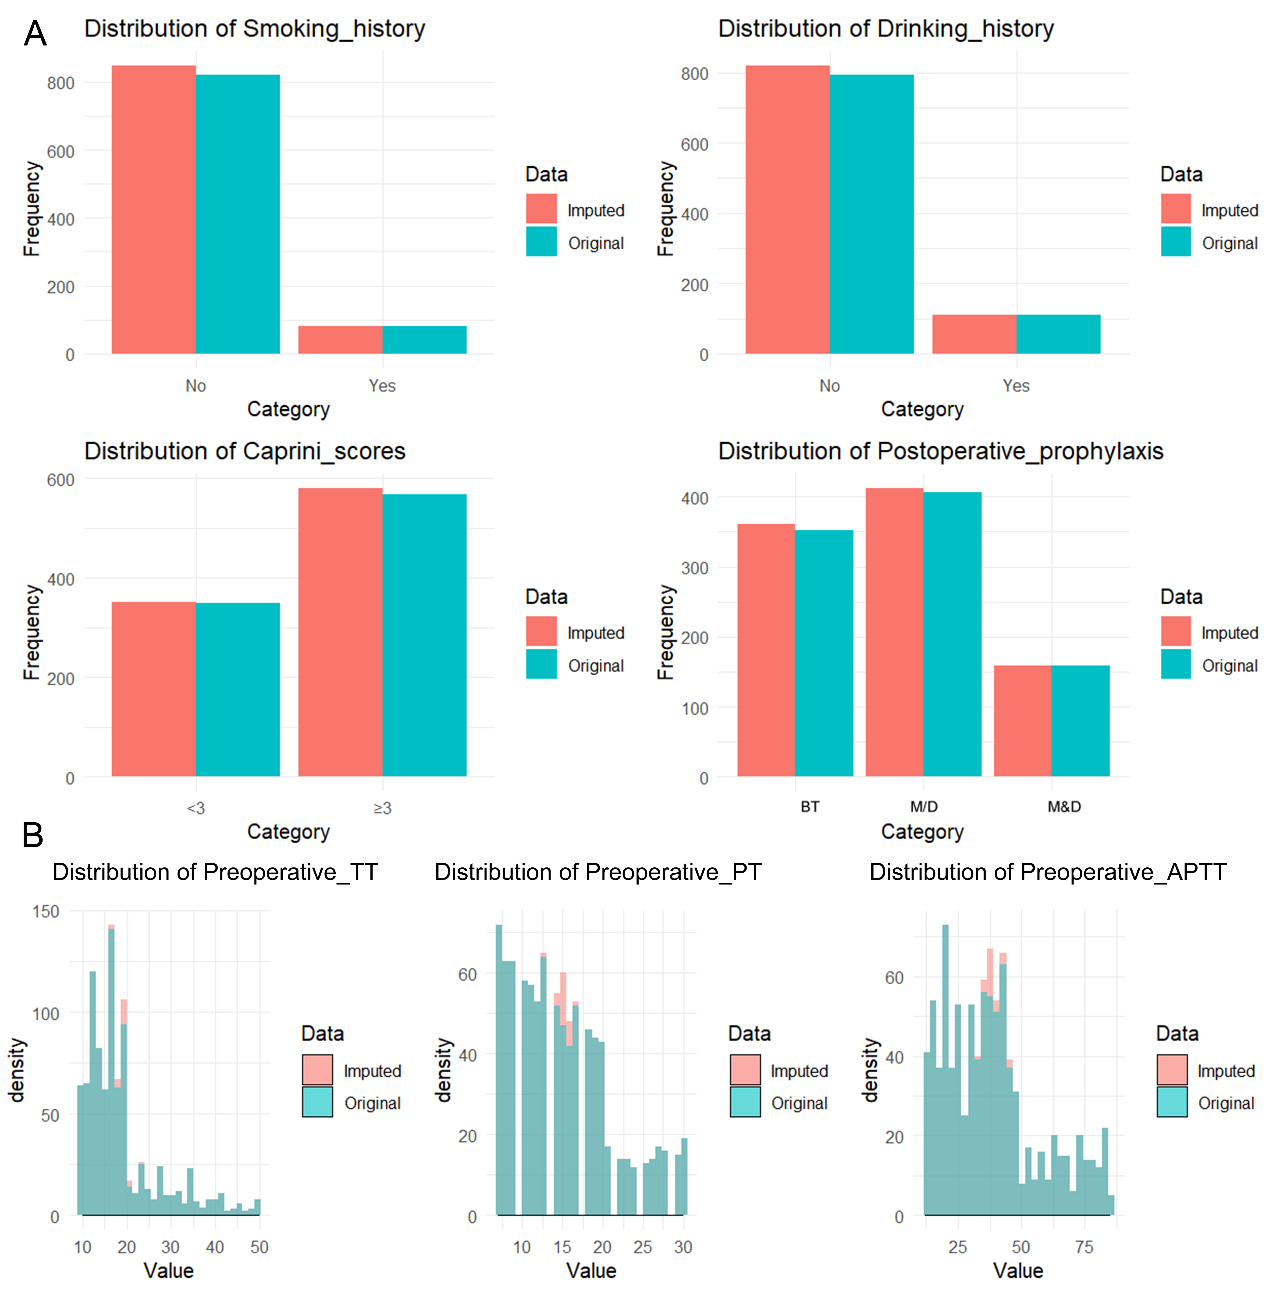


**Supplementary Figure S1.** The distribution of variables before and after imputation. (A) The distribution of categorized variables before and after imputation. (B) The distribution of continuous variables before and after imputation. **Abbreviations:** BT, basic thromboprophylaxis; M/D, mechanical/anticoagulation drugs; M&D, mechanical with anticoagulation drugs; TT, thrombin time; PT, prothrombin time; APTT, activated partial thromboplastin time.

**Supplementary Table S1.** Hyperparameters for eight models.

| **Model** | **Core Method (Package + Function/Strategy)** | **Core Parameters (Tuning + Fixed Parameters)** |
| --- | --- | --- |
| Random Forest | 1. Package: randomForest (final training), caret (tuning using ranger) | - Tuning Parameters: |
| (RF) | 2. Oversampling: SMOTETomek (deduplication + missing value removal) | - mtry: 1~2 (number of random features selected) |
|  | 3. Strategy: dynamic selection of optimal tree count using OOB error, | - min.node.size: 25~35 (after tuning + 15 as final nodesize) |
|  | feature standardization (center+scale) | - splitrule: tuned as "extratrees", fixed as "gini" in the final model |
|  |  | - Fixed Parameters: |
|  |  | - Initial ntree: 500 (selecting optimal dynamically, at least 100 trees) |
|  |  | - importance: TRUE (compute feature importance) |
|  |  | - seed: 135 |
|  |  | - Oversampling perc_over: 20 (light oversampling) |
| Extreme Gradient | 1. Package: xgboost, caret (tuning) | - Tuning Parameters: |
| Boosting Machine | 2. Data Format: xgb.DMatrix (convert labels to 0/1) | - nrounds: 50~100 (iterations) |
| (XGBoost) | 3. Oversampling: SMOTETomek, feature standardization (center+scale) | - max_depth: 2~4 (tree depth) |
|  | 4. Objective: binary classification (binary:logistic) | - eta: 0.05~0.1 (learning rate) |
|  |  | - subsample: 0.7~0.8 (sample rate) |
|  |  | - colsample_bytree: 0.7~0.8 (feature sample rate) |
|  |  | - min_child_weight: 3~5 (minimum child weight) |
|  |  | - Fixed Parameters: |
|  |  | - objective: "binary:logistic" (binary classification) |
|  |  | - lambda: 2.8 (L2 regularization) |
|  |  | - alpha: 1.4 (L1 regularization) |
|  |  | - scale_pos_weight: 1.4 (balance class weights) |
|  |  | - seed: 135 |
|  |  | - verbose: 0 (suppress training logs) |
| Support Vector | 1. Package: e1071 (svm function), caret (tuning) | - Tuning Parameters: |
| Machine (SVM) | 2. Kernel Function: radial basis (radial) | - C: 0.1~1 (regularization strength) |
|  | 3. Oversampling: SMOTETomek, feature standardization (center+scale) | - sigma: 0.01~0.1 (radial basis kernel bandwidth) |
|  | 4. Strategy: calculate class probabilities (probability=TRUE) | - Fixed Parameters: |
|  |  | - kernel: "radial" (radial basis kernel) |
|  |  | - probability: TRUE (output probabilities) |
|  |  | - shrinking: FALSE (disable shrinking heuristic) |
|  |  | - epsilon: 0.3 (ε-insensitive loss) |
|  |  | - class.weights: training set c("No"=1.2, "Yes"=1), final model c("No"=1, "Yes"=0.8) |
| Light Gradient | 1. Package: lightgbm, caret (tuning) | - Tuning Parameters: |
| Boosting Machine | 2. Data Format: lgb.Dataset (convert labels to 0/1) | - nrounds: 50~100 (iterations) |
| (LightGBM) | 3. Oversampling: SMOTETomek (deduplication + missing value removal), | - max_depth: 2~4 (tree depth) |
|  | feature standardization (center+scale) | - learning_rate: 0.05~0.1 (learning rate, equivalent to eta in XGBoost) |
|  | 4. Objective: binary classification (binary) | - min_child_weight: 20~30 (minimum child weight) |
|  |  | - subsample: 0.7~0.8 (sample rate) |
|  |  | - colsample_bytree: 0.7~0.8 (feature sample rate) |
|  |  | - Fixed Parameters: |
|  |  | - objective: "binary" (binary classification) |
|  |  | - is_unbalance: TRUE (handle imbalanced data) |
|  |  | - seed: 135 |
|  |  | - verbose: -1 (suppress training logs) |
|  |  | - Probability truncation: 0.05~0.95 (avoid extreme values) |
| Logistic Regression | 1. Package: base (glm function) | - No Tuning Parameters (empty implementation in tune_model_parameters, using default values) |
| (LR) | 2. Distribution: binomial distribution (binomial) | - Fixed Parameters: |
|  | 3. Oversampling: DMwR::SMOTE (formula method), | - family: binomial() (binomial distribution, corresponds to logistic regression) |
|  | feature standardization (center+scale) | - Formula: Result ~ . (all selected features) |
|  |  | - Probability output: type="response" (output 0~1 probability) |
| Naïve Bayes | 1. Package: e1071 (naiveBayes function) | - No Tuning Parameters (empty implementation in tune_model_parameters, using default values) |
| (NB) | 2. Smoothing: Laplace smoothing (laplace=1) | - Fixed Parameters: |
|  | 3. Oversampling: DMwR::SMOTE (formula method), | - laplace: 1 (Laplace smoothing, avoid zero probability) |
|  | feature standardization (center+scale) | - Formula: Result ~ . (all selected features) |
|  |  | - Probability output: type="raw" (output class probabilities) |
| Decision Tree | 1. Package: rpart (rpart function), caret (tuning) | - Tuning Parameters: |
| (DT) | 2. Task Type: classification (method="class") | - cp: 0.0001~0.01 (step size 0.0005, complexity parameter, controls pruning) |
|  | 3. Oversampling: DMwR::SMOTE (deduplication + missing value removal), | - Fixed Parameters: |
|  | feature standardization (center+scale) | - method: "class" (classification task) |
|  |  | - minsplit: 8 (minimum sample number at node) |
|  |  | - maxdepth: 6 (maximum tree depth, prevent overfitting) |
|  |  | - Formula: Result ~ . (all selected features) |
|  |  | - Probability output: type="prob" (output class probabilities) |
|  |  | - Probability shift: dynamically shifted to around 0.5 when mean < 0.3 |

**Supplementary Table S2.** Baseline characteristics of patients in training and testing sets.

| Characteristics | Total  (N = 931) | Training set  (N = 652) | Validation set  (N = 279) | Statistics | *P*-  value | Miss data (%) |
| --- | --- | --- | --- | --- | --- | --- |
| Age (years) | 65.00 [56.00,72.00] | 64.00 [58.00,72.00] | 65.00 [54.00,72.00] | -0.225 | 0.822 | / |
| BMI (kg/m2) | 24.70 [21.10,28.50] | 24.70 [20.90,28.90] | 24.75 [21.10,28.28] | -0.217 | 0.828 | / |
| Duration of disease (year) | 2.00 [1.20,2.80] | 1.90 [1.20,2.70] | 2.10 [1.30,2.80] | -0.953 | 0.340 | / |
| FIGO stage |  |  |  |  |  | / |
| I-II | 299 (32.1%) | 197 (30.2%) | 102 (36.6%) | 3.607 | 0.058 | / |
| III-IV | 632 (67.9%) | 455 (69.8%) | 177 (63.4%) |  |  | / |
| Surgical type |  |  |  |  |  | / |
| Laparoscope | 382 (41.0%) | 268 (41.1%) | 114 (40.9%) | 0.005 | 0.945 | / |
| Laparotomy | 549 (59.0%) | 384 (58.9%) | 165 (59.1%) |  |  | / |
| Smoking history | 82 (8.8%) | 63 (9.7%) | 19 (6.8%) | 1.979 | 0.159 | 28 (3.0%) |
| Drinking history | 111 (11.9%) | 73 (11.2%) | 38 (13.6%) | 1.093 | 0.296 | 27 (2.9%) |
| Diabetes (yes) | 204 (21.9%) | 135 (20.7%) | 69 (24.7%) | 1.851 | 0.174 | / |
| Hypertension (yes) | 234 (25.1%) | 166 (25.5%) | 68 (24.4%) | 0.123 | 0.726 | / |
| Hyperlipemia (yes) | 298 (32.0%) | 198 (30.4%) | 100 (35.8%) | 2.690 | 0.101 | / |
| Menopause (yes) | 790 (84.9%) | 558 (85.6%) | 232 (83.2%) | 0.897 | 0.344 | / |
| CHD (yes) | 158 (17.0%) | 115 (17.6%) | 43 (15.4%) | 0.687 | 0.407 | / |
| Stoke (yes) | 121 (13.0%) | 79 (12.1%) | 42 (15.1%) | 1.491 | 0.222 | / |
| Pulmonary disease (yes) | 84 (9.0%) | 60 (9.2%) | 24 (8.6%) | 0.086 | 0.770 | / |
| Anemia (yes) | 204 (21.9%) | 138 (21.2%) | 66 (23.7%) | 0.708 | 0.400 | / |
| Childbearing time |  |  |  |  |  | / |
| <2 | 344 (36.9%) | 249 (38.2%) | 95 (34.1%) | 1.437 | 0.231 | / |
| ≥2 | 587 (63.1%) | 403 (61.8%) | 184 (65.9%) |  |  | / |
| Pelvic and abdominal surgery history | 391 (42.0%) | 271 (41.6%) | 120 (43.0%) | 0.168 | 0.682 | / |
| Neoadjuvant chemotherapy (yes) | 307 (33.0%) | 216 (33.1%) | 91 (32.6%) | 0.023 | 0.879 | / |
| Surgical duration (min) | 245.00 [166.00,326.00] | 245.00 [172.00,338.00] | 243.50 [166.00,319.75] | -0.522 | 0.602 | / |
| Operative bleeding (mL) | 209.00 [138.00,299.00] | 196.00 [120.00,295.00] | 209.50 [143.00,300.00] | -1.196 | 0.232 | / |
| Blood transfusion (yes) | 214 (23.0%) | 151 (23.2%) | 63 (22.6%) | 0.037 | 0.847 | / |
| Caprini scores |  |  |  |  |  | / |
| <3 | 351 (37.7%) | 252 (38.7%) | 99 (35.5%) | 0.834 | 0.361 | 14 (1.5) |
| ≥3 | 580 (62.3%) | 400 (61.3%) | 180 (64.5%) |  |  | / |
| Ascites (mL) |  |  |  |  |  | / |
| <1,000 | 568 (61.0%) | 392 (60.1%) | 176 (63.1%) | 0.720 | 0.396 | / |
| ≥1,000 | 363 (39.0%) | 260 (39.9%) | 103 (36.9%) |  |  | / |
| ASA |  |  |  |  |  | / |
| I-II | 577 (62.0%) | 411 (63.0%) | 166 (59.5%) | 1.038 | 0.308 | / |
| III-IV | 354 (38.0%) | 241 (37.0%) | 113 (40.5%) |  |  | / |
| Tumor size (cm) |  |  |  |  |  | / |
| <10 | 540 (58.0%) | 381 (58.4%) | 159 (57.0%) | 0.168 | 0.682 | / |
| ≥10 | 391 (42.0%) | 271 (41.6%) | 120 (43.0%) |  |  | / |
| Histology |  |  |  |  |  | / |
| Non-serous | 270 (29.0%) | 188 (28.8%) | 82 (29.4%) | 0.029 | 0.864 | / |
| Serous | 661 (71.0%) | 464 (71.2%) | 197 (70.6%) |  |  | / |
| Timing of surgery |  |  |  |  |  | / |
| Primary | 773 (83.0%) | 534 (81.9%) | 239 (85.7%) | 1.962 | 0.161 | / |
| Recurrence | 158 (17.0%) | 118 (18.1%) | 40 (14.3%) |  |  | / |
| SCS score |  |  |  |  |  | / |
| Low | 570 (61.2%) | 397 (60.9%) | 173 (62.0%) | 1.989 | 0.370 | / |
| Intermediate | 234 (25.1%) | 171 (26.2%) | 63 (22.6%) |  |  | / |
| High | 127 (13.6%) | 84 (12.9%) | 43 (15.4%) |  |  | / |
| Postoperative prophylaxis |  |  |  |  |  | 15 (1.6%) |
| Basic thromboprophylaxisa | 158 (17.0%) | 103 (15.8%) | 55 (19.7%) | 2.295 | 0.317 | / |
| Mechanical/anticoagulation drugs | 361 (38.8%) | 259 (39.7%) | 102 (36.6%) |  |  | / |
| Mechanical with anticoagulation drugs | 412 (44.3%) | 290 (44.5%) | 122 (43.7%) |  |  | / |
| Residual disease |  |  |  |  |  | / |
| No gross disease or microscopic | 465 (49.9%) | 333 (51.1%) | 132 (47.3%) | 1.922 | 0.383 | / |
| 0.1-1 cm | 302 (32.4%) | 211 (32.4%) | 91 (32.6%) |  |  | / |
| >1 cm | 164 (17.6%) | 108 (16.6%) | 56 (20.1%) |  |  | / |
| Postoperative chemotherapyb (yes) | 438 (47.0%) | 296 (45.4%) | 142 (50.9%) | 2.370 | 0.124 | / |
| Postoperative ICU (yes) | 74 (7.9%) | 51 (7.8%) | 23 (8.2%) | 0.047 | 0.828 | / |
| 30-day postoperative complicationsc |  |  |  |  |  | / |
| Bowel obstruction | 102 (11.0%) | 76 (11.7%) | 26 (9.3%) | 1.094 | 0.296 | / |
| Anastomotic leakage | 84 (9.0%) | 52 (8.0%) | 32 (11.5%) | 2.906 | 0.088 | / |
| Pleural effusion | 94 (10.1%) | 65 (10.0%) | 29 (10.4%) | 0.039 | 0.844 | / |
| Wound infection | 123 (13.2%) | 80 (12.3%) | 43 (15.4%) | 1.683 | 0.195 | / |
| Abdominal/pelvic infection | 56 (6.0%) | 33 (5.1%) | 23 (8.2%) | 3.500 | 0.061 | / |
| Urinary tract infection | 37 (4.0%) | 24 (3.7%) | 13 (4.7%) | 0.490 | 0.484 | / |
| Cardiac event | 86 (9.2%) | 56 (8.6%) | 30 (10.8%) | 1.091 | 0.296 | / |
| Preoperative test |  |  |  |  |  | / |
| CA125 (U/mL) | 487.00 [266.00,719.00] | 544.00 [308.00,724.00] | 465.50 [247.50,718.75] | -1.924 | 0.054 | / |
| TT (s) | 17.00 [13.00,20.00] | 16.00 [13.00,20.00] | 17.00 [13.00,20.00] | -0.050 | 0.960 | 22 (2.4%) |
| PT (s) | 14.00 [10.00,19.00] | 14.00 [10.00,18.00] | 14.00 [10.00,19.00] | -0.744 | 0.457 | 24 (2.6%) |
| APTT (s) | 36.00 [23.00,47.00] | 37.00 [22.00,45.00] | 35.50 [24.00,47.00] | -0.568 | 0.570 | 24 (2.6%) |
| Fibrinogen (g/L) | 3.00 [2.00,5.00] | 3.00 [2.00,5.00] | 3.00 [2.00,5.00] | -0.281 | 0.779 | / |
| D-dimer (μg/mL) | 3.60 [1.40,6.40] | 3.70 [1.80,6.20] | 3.60 [1.30,6.50] | -0.511 | 0.609 | / |
| Albumin (g/L) | 35.00 [24.00,47.00] | 34.00 [24.00,45.00] | 35.00 [24.00,48.00] | -1.404 | 0.160 | / |
| Platelet (109/L) | 315.00 [196.00,432.00] | 320.00 [192.00,431.00] | 314.00 [199.00,433.50] | -0.337 | 0.736 | / |
| WBC (109/L) | 6.00 [4.00,10.00] | 6.00 [3.00,10.00] | 6.00 [4.00,10.00] | -1.207 | 0.228 | / |
| Postoperative test |  |  |  |  |  | / |
| TT (s) | 14.00 [8.00,19.00] | 13.00 [9.00,19.00] | 14.00 [8.00,19.00] | -0.060 | 0.952 | / |
| PT (s) | 11.00 [9.00,16.00] | 11.00 [8.00,16.00] | 11.00 [9.00,16.00] | -1.567 | 0.117 | / |
| APTT (s) | 27.00 [18.00,39.00] | 28.00 [18.00,42.00] | 26.00 [17.25,38.00] | -1.919 | 0.055 | / |
| Fibrinogen (g/L) | 3.00 [1.00,5.00] | 3.00 [1.00,5.00] | 2.00 [1.00,5.00] | -0.822 | 0.411 | / |
| D-dimer (μg/mL) | 5.80 [3.70,9.50] | 5.90 [3.80,9.50] | 5.70 [3.60,9.60] | -0.218 | 0.828 | / |
| Albumin (g/L) | 23.00 [16.00,32.00] | 23.00 [16.00,32.00] | 23.00 [16.00,31.75] | -0.199 | 0.842 | / |
| Platelet (109/L) | 247.00 [143.00,350.00] | 228.00 [124.00,350.00] | 254.00 [151.00,349.75] | -1.869 | 0.062 | / |
| WBC (109/L) | 11.00 [7.00,17.00] | 11.00 [7.00,17.00] | 11.00 [7.00,17.00] | -0.749 | 0.454 | / |

**Note.**aBasic thromboprophylaxis included early mobilization of the lower extremities and drinking at least 1 L water per day.

bPostoperative chemotherapy administered within six months prior to VTE diagnosis.

cComplications occurred within 30-day post-surgery before VTE are considered.

**Abbreviations:** BMI, body mass index; ASA, American Society of Anesthesiologists; CHD, chronic heart disease; SCS, Surgical Complexity Scores; FIGO, International Federation of Gynecology and Obstetrics; ICU, intensive care unit; TT, thrombin time; PT, prothrombin time; APTT, activated partial thromboplastin time; WBC, white blood cells; CA125, cancer antigen 125.
